# Supplementary material
Source: PubMed Central journal article supplement (PMC6669785)
Supplement: jamasurg-154-861-s001.pdf [file jamasurg-154-861-s001.pdf]

## Supplementary Online Content

Gambhir S, Daly S, Grigorian A, et al. Association of *US News & World Report* top ranking for gastroenterology and gastrointestinal operation with patient outcomes in abdominal procedures. *JAMA Surg*. Published online July 31, 2019.  
doi:10.1001/jamasurg.2019.2327

**eAppendix.** *US News & World Report* Gastroenterology and Gastrointestinal Surgery Ranking Methodology

This supplementary material has been provided by the authors to give readers additional information about their work.

## **eAppendix. US News & World Report Gastroenterology and Gastrointestinal Surgery Ranking Methodology**

---

- 1) Eligibility criteria for US News and World Report ranking consideration requires a hospital to fulfill at least one of the following conditions:
    - a. considered a teaching hospital
    - b. affiliation with a medical school
    - c. minimum of 200 beds
    - d. minimum of 100 beds with concomitant availability of at least four out of eight advanced medical technologies deemed significant by US News Best Hospitals (1).
  - 2) Eligibility for specialty ranking:
    - a. Defined number of discharges for specialty-specific diagnoses (high volume of discharge is a surrogate for experience)
    - b. In 2017, for the Gastroenterology and Gastrointestinal Surgery specialty ranking required a surgical discharge threshold of 111 Medicare patients.
  - 3) Ranked by a weighted scoring system:
    - a. outcomes (including risk-adjusted mortality)
    - b. structure (hospital resources allocated for patient care)
    - c. process (based on expert opinion)
    - d. patient safety quality indicators.
-
